# Supplementary material for: Quantification of human enteric viruses as alternative indicators of fecal pollution to evaluate wastewater treatment processes
Source: PubMed Central journal article supplement (PMC8852272; doi:10.7717/peerj.12957), 2022-02-14

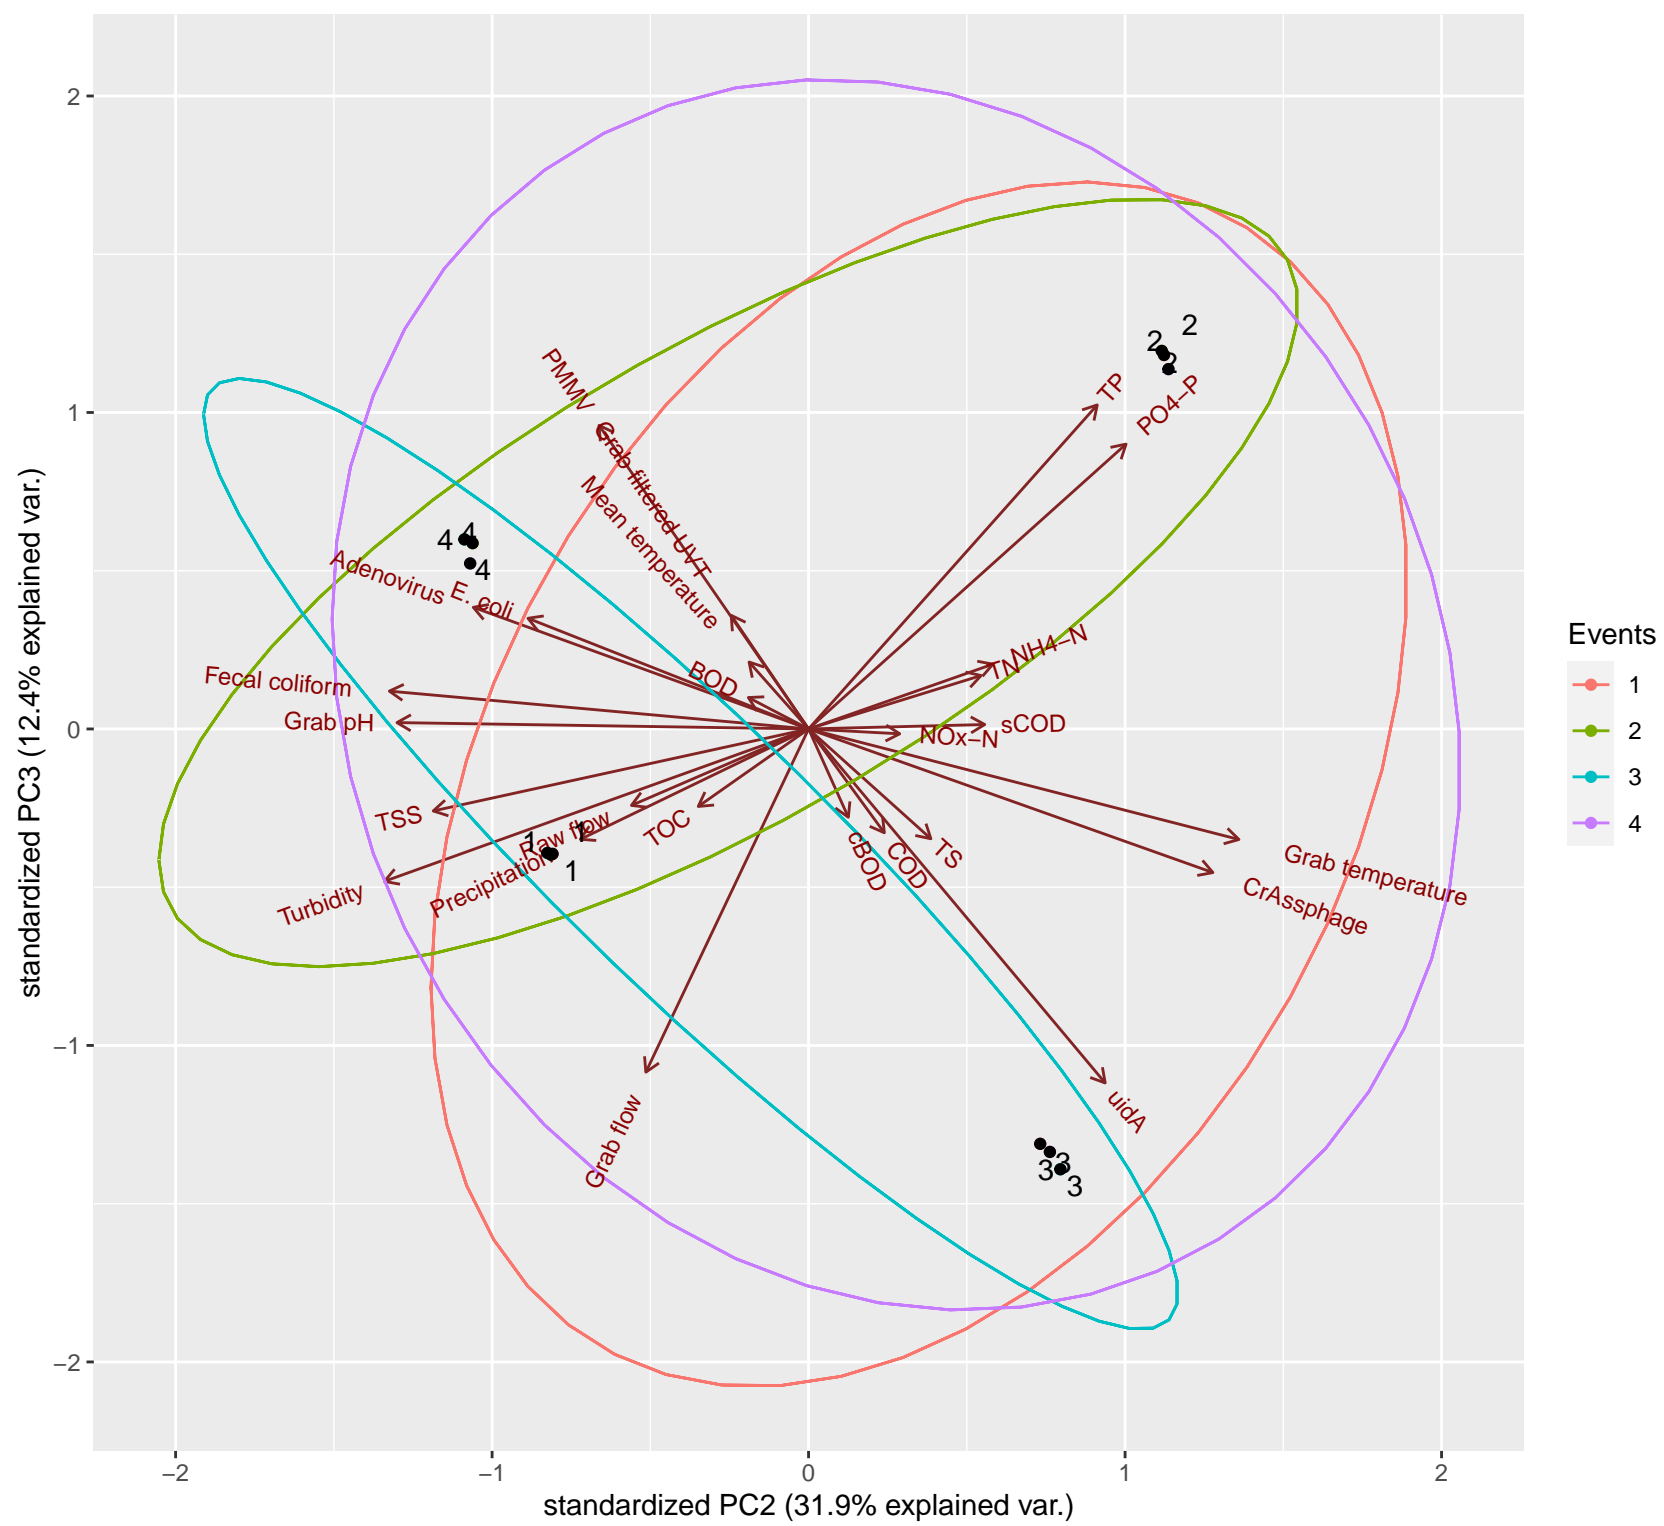

Supplement: peerj-10-12957-s007.pdf [file peerj-10-12957-s007.pdf]
