# Supplementary material for: Quantification of human enteric viruses as alternative indicators of fecal pollution to evaluate wastewater treatment processes
Source: PeerJ journal article supplement (doi:10.7717/peerj.12957), 2022-02-14

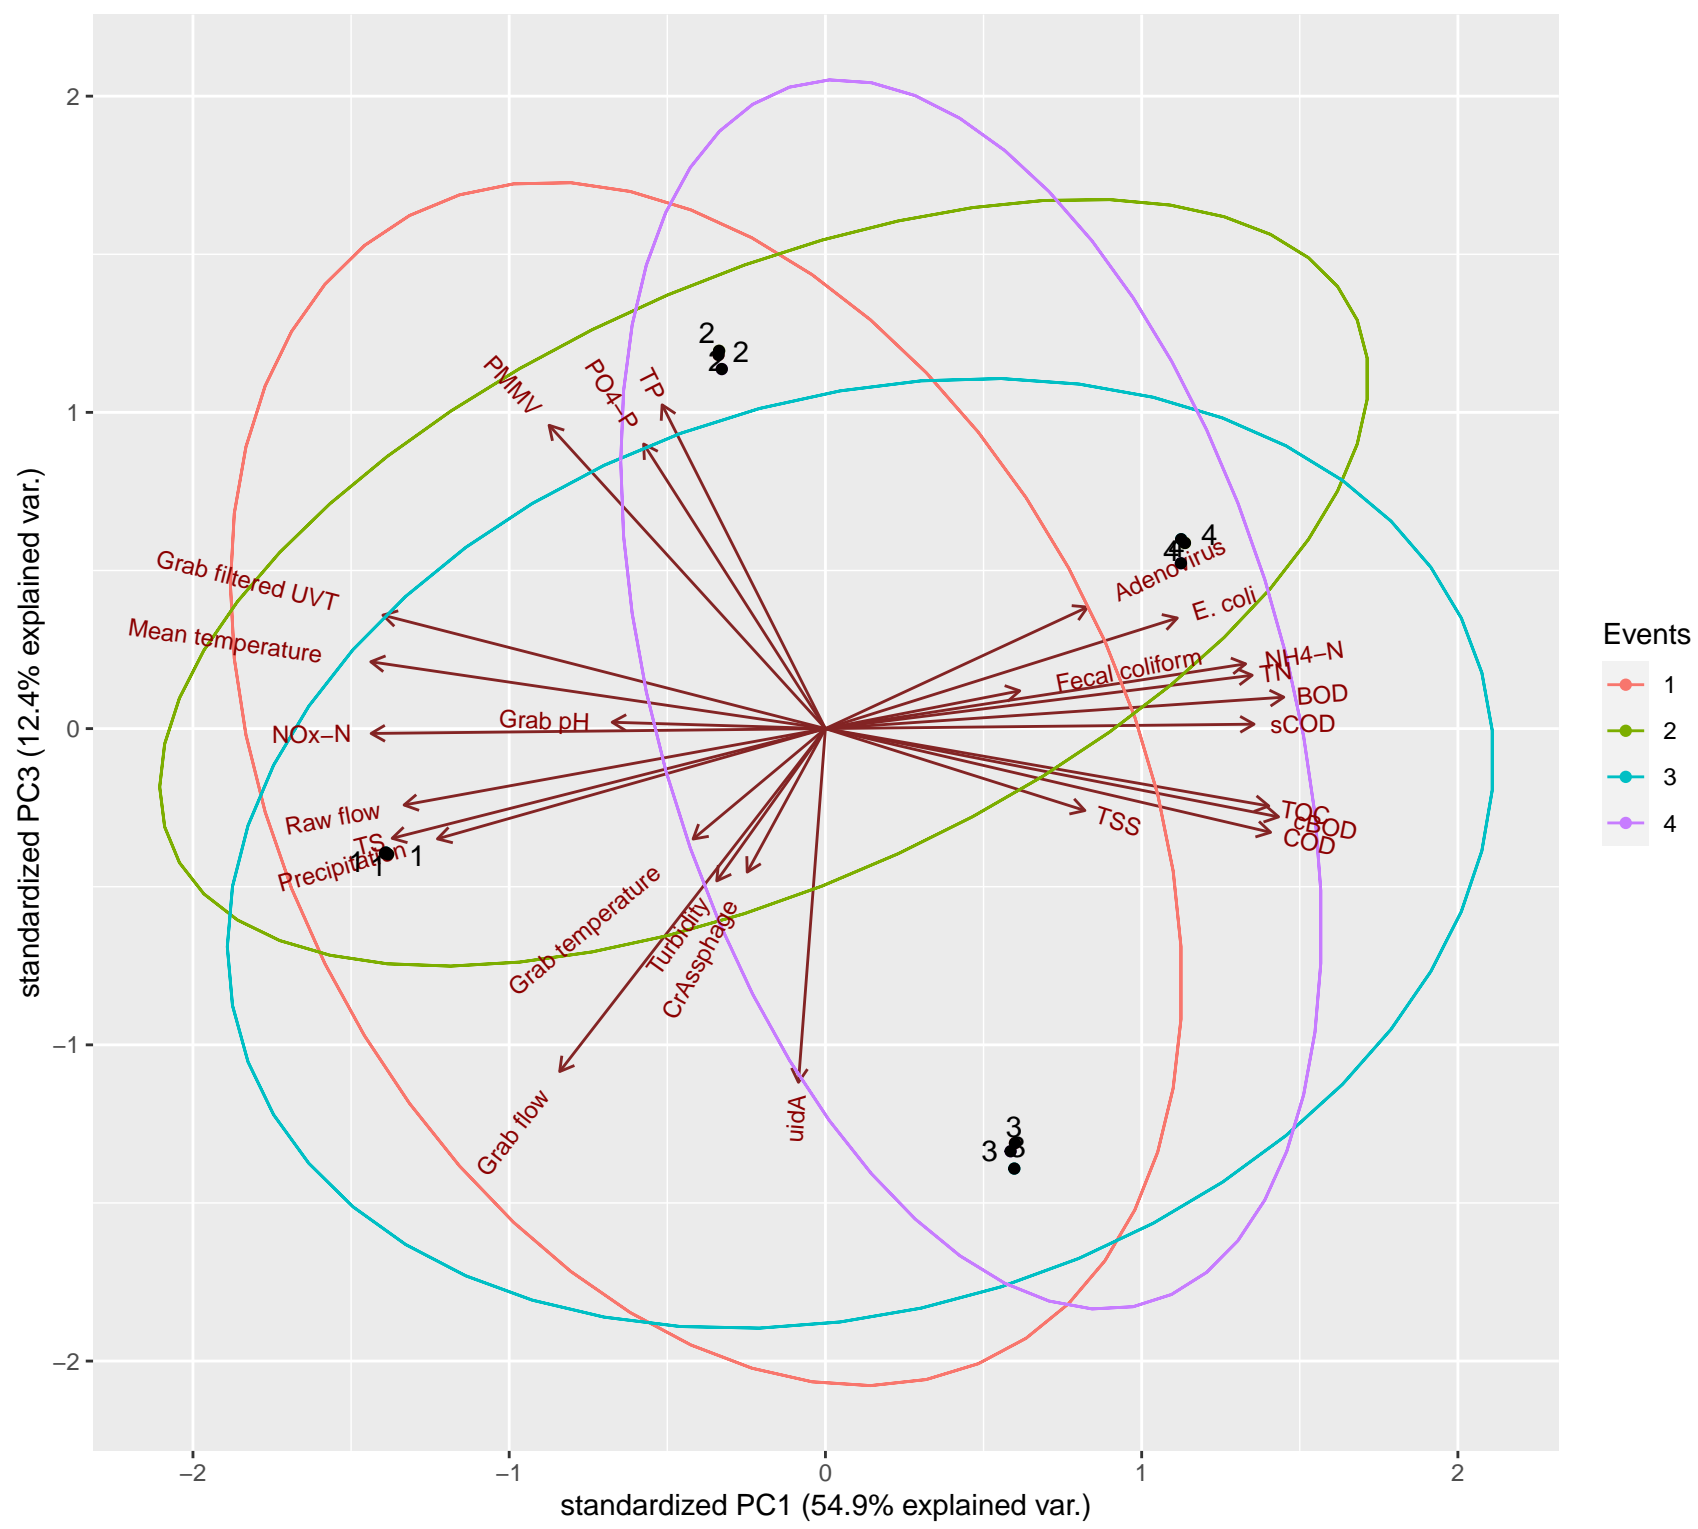

Supplement: Supplemental_Figure_S3.pdf [file Supplemental_Figure_S3.pdf]
